# Supplementary material
Source: Springer Nature journal article supplement (https://www.springermedizin.de/resource/supplementary/13643_2012_54_MOESM3_ESM.pdf/9681348)

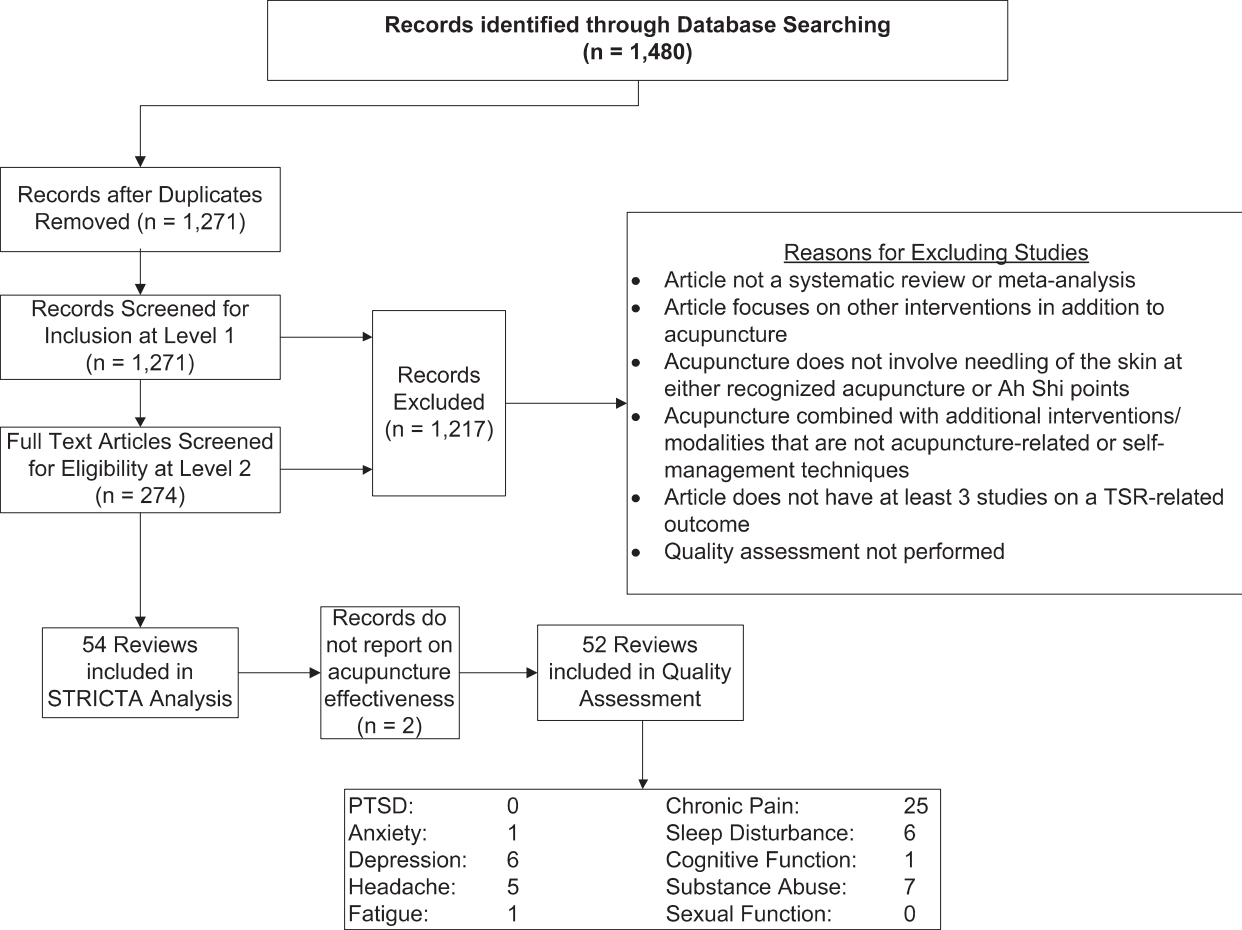

Supplement: MOESM3 [file 9681348]
